# Supplementary material for: APEX1 regulates alternative splicing of key tumorigenesis genes in non-small-cell lung cancer
Source: BMC Med Genomics. 2022 Jul 2;15:147. doi: 10.1186/s12920-022-01290-0 (PMC9250739; doi:10.1186/s12920-022-01290-0)
Supplement: Supplementary file 2 — Additional file 2: Table S2. HiSeqV2 APEX1 expression box. [file 12920_2022_1290_MOESM2_ESM.xlsx]

## Sheet: HiSeqV2_APEX1_expression_box
sampleID	APEX1	Type		Sample	Mean	SE	SD	Pvalue
TCGA-50-5931-11	10.5613	Normal		Normal	10.8288	0.0377062	0.289627	1.83582e-23	***
TCGA-49-4512-11	11.3993	Normal		Tumor	11.5556	0.0232999	0.529784
TCGA-49-6743-11	11.1805	Normal
TCGA-44-6148-11	10.5303	Normal		Normal	59
TCGA-50-5939-11	10.6436	Normal		Tumor	517
TCGA-55-6984-11	10.6851	Normal
TCGA-44-2657-11	11.1882	Normal
TCGA-55-6975-11	10.6491	Normal
TCGA-55-6986-11	10.4693	Normal
TCGA-91-6835-11	10.9582	Normal
TCGA-91-6849-11	10.6022	Normal
TCGA-55-6983-11	10.7467	Normal
TCGA-55-6978-11	10.6504	Normal
TCGA-44-5645-11	10.7824	Normal
TCGA-55-6981-11	10.7252	Normal
TCGA-50-5935-11	10.8049	Normal
TCGA-44-3396-11	10.7262	Normal
TCGA-55-6968-11	11.1994	Normal
TCGA-49-6745-11	11.4311	Normal
TCGA-50-5936-11	10.797	Normal
TCGA-91-6836-11	10.799	Normal
TCGA-44-2655-11	10.8598	Normal
TCGA-55-6980-11	10.6841	Normal
TCGA-44-6146-11	10.5134	Normal
TCGA-38-4626-11	11.2729	Normal
TCGA-38-4627-11	11.2967	Normal
TCGA-50-6595-11	10.4976	Normal
TCGA-50-5930-11	10.6944	Normal
TCGA-55-6985-11	10.8358	Normal
TCGA-55-6972-11	10.4384	Normal
TCGA-73-4676-11	11.2461	Normal
TCGA-44-3398-11	10.779	Normal
TCGA-91-6831-11	10.4357	Normal
TCGA-55-6971-11	10.5783	Normal
TCGA-44-2661-11	11.0732	Normal
TCGA-55-6969-11	10.8718	Normal
TCGA-55-6970-11	10.6354	Normal
TCGA-50-5933-11	10.2779	Normal
TCGA-91-6829-11	11.2097	Normal
TCGA-44-6778-11	10.7923	Normal
TCGA-44-6776-11	10.667	Normal
TCGA-38-4625-11	11.1575	Normal
TCGA-49-6761-11	10.7411	Normal
TCGA-91-6847-11	10.5754	Normal
TCGA-44-6145-11	10.7085	Normal
TCGA-91-6828-11	10.345	Normal
TCGA-44-6144-11	10.9831	Normal
TCGA-38-4632-11	11.406	Normal
TCGA-55-6979-11	11.0647	Normal
TCGA-44-6147-11	10.4524	Normal
TCGA-49-4490-11	11.4076	Normal
TCGA-44-2665-11	11.0261	Normal
TCGA-50-5932-11	10.6475	Normal
TCGA-44-2662-11	10.7286	Normal
TCGA-44-2668-11	10.9309	Normal
TCGA-49-6744-11	10.7391	Normal
TCGA-49-6742-11	11.0779	Normal
TCGA-55-6982-11	10.796	Normal
TCGA-44-6777-11	10.9247	Normal
TCGA-69-7978-01	10.8666	Tumor
TCGA-62-8399-01	12.2351	Tumor
TCGA-78-7539-01	12.0631	Tumor
TCGA-73-4658-01	11.8158	Tumor
TCGA-44-6775-01	10.8163	Tumor
TCGA-44-2655-01	11.8665	Tumor
TCGA-44-3398-01	12.0396	Tumor
TCGA-62-8397-01	11.5463	Tumor
TCGA-53-A4EZ-01	11.6718	Tumor
TCGA-50-7109-01	12.0521	Tumor
TCGA-38-6178-01	11.5691	Tumor
TCGA-86-8056-01	10.5013	Tumor
TCGA-55-1592-01	11.7493	Tumor
TCGA-86-A4JF-01	11.7219	Tumor
TCGA-69-7974-01	11.2538	Tumor
TCGA-86-A456-01	11.1275	Tumor
TCGA-97-8547-01	11.352	Tumor
TCGA-55-1595-01	11.6509	Tumor
TCGA-NJ-A4YP-01	11.8185	Tumor
TCGA-05-4424-01	11.7757	Tumor
TCGA-97-A4M7-01	11.397	Tumor
TCGA-44-2668-01	11.5737	Tumor
TCGA-NJ-A55A-01	11.1697	Tumor
TCGA-05-5420-01	12.6442	Tumor
TCGA-55-1594-01	11.7196	Tumor
TCGA-44-2659-01	11.8698	Tumor
TCGA-78-7162-01	11.262	Tumor
TCGA-38-4632-01	11.9148	Tumor
TCGA-49-6761-01	10.9647	Tumor
TCGA-91-6828-01	11.2712	Tumor
TCGA-05-4418-01	11.5291	Tumor
TCGA-99-AA5R-01	10.9825	Tumor
TCGA-55-7903-01	11.3404	Tumor
TCGA-55-A492-01	11.2791	Tumor
TCGA-55-8616-01	11.4893	Tumor
TCGA-86-7954-01	11.2778	Tumor
TCGA-05-4433-01	11.0892	Tumor
TCGA-69-8253-01	11.5594	Tumor
TCGA-86-8674-01	12.2387	Tumor
TCGA-69-7765-01	10.8562	Tumor
TCGA-86-8672-01	11.2716	Tumor
TCGA-MP-A4T6-01	11.8512	Tumor
TCGA-97-7547-01	10.4488	Tumor
TCGA-55-7911-01	11.5656	Tumor
TCGA-91-6835-01	11.4492	Tumor
TCGA-55-A48Z-01	10.9994	Tumor
TCGA-50-5045-01	12.2639	Tumor
TCGA-55-7913-01	12.3444	Tumor
TCGA-86-8075-01	11.5524	Tumor
TCGA-97-8177-01	11.5273	Tumor
TCGA-55-7907-01	11.644	Tumor
TCGA-44-8117-01	11.6283	Tumor
TCGA-86-8668-01	10.982	Tumor
TCGA-78-8660-01	11.364	Tumor
TCGA-05-4415-01	12.3086	Tumor
TCGA-75-6212-01	12.1957	Tumor
TCGA-67-6215-01	11.3202	Tumor
TCGA-05-4430-01	11.6583	Tumor
TCGA-49-6742-01	11.8277	Tumor
TCGA-38-4627-01	11.8196	Tumor
TCGA-69-7979-01	11.5184	Tumor
TCGA-69-7973-01	12.3476	Tumor
TCGA-73-7499-01	11.7987	Tumor
TCGA-44-A47A-01	11.6942	Tumor
TCGA-78-8662-01	12.3484	Tumor
TCGA-55-8085-01	11.9032	Tumor
TCGA-75-6206-01	10.7564	Tumor
TCGA-50-5932-01	11.6938	Tumor
TCGA-50-6594-01	12.5023	Tumor
TCGA-49-AARQ-01	11.3866	Tumor
TCGA-55-7574-01	11.2439	Tumor
TCGA-50-5066-01	12.8993	Tumor
TCGA-86-A4P7-01	11.2542	Tumor
TCGA-64-5779-01	11.4004	Tumor
TCGA-55-8096-01	11.5431	Tumor
TCGA-97-8175-01	11.9056	Tumor
TCGA-44-A4SS-01	10.6318	Tumor
TCGA-91-7771-01	11.5703	Tumor
TCGA-86-8278-01	11.7214	Tumor
TCGA-55-8087-01	11.5026	Tumor
TCGA-MP-A4T8-01	12.5143	Tumor
TCGA-L9-A5IP-01	11.1104	Tumor
TCGA-55-6979-01	11.7546	Tumor
TCGA-69-7980-01	11.2541	Tumor
TCGA-62-A472-01	11.5212	Tumor
TCGA-49-4507-01	11.5496	Tumor
TCGA-55-6642-01	11.4904	Tumor
TCGA-86-7701-01	11.2874	Tumor
TCGA-62-A46R-01	11.1105	Tumor
TCGA-62-A46V-01	11.9412	Tumor
TCGA-44-6146-01	10.2048	Tumor
TCGA-49-4501-01	11.8978	Tumor
TCGA-55-7914-01	11.5706	Tumor
TCGA-73-4659-01	11.9901	Tumor
TCGA-86-8669-01	11.7294	Tumor
TCGA-49-AAQV-01	11.791	Tumor
TCGA-78-7149-01	11.836	Tumor
TCGA-86-8055-01	11.5684	Tumor
TCGA-91-6829-01	11.579	Tumor
TCGA-78-7163-01	10.5394	Tumor
TCGA-62-8398-01	11.279	Tumor
TCGA-38-A44F-01	11.1646	Tumor
TCGA-38-4631-01	11.5793	Tumor
TCGA-L9-A7SV-01	12.0428	Tumor
TCGA-49-AAR2-01	11.3887	Tumor
TCGA-MP-A4SY-01	11.5851	Tumor
TCGA-05-4432-01	11.6727	Tumor
TCGA-05-4398-01	11.5593	Tumor
TCGA-75-6211-01	12.001	Tumor
TCGA-44-6778-01	11.7165	Tumor
TCGA-55-8510-01	11.666	Tumor
TCGA-50-5946-02	11.5431	Tumor
TCGA-MP-A4TD-01	11.8218	Tumor
TCGA-55-8205-01	11.1495	Tumor
TCGA-55-7573-01	11.1014	Tumor
TCGA-MP-A4T4-01	11.3597	Tumor
TCGA-97-7941-01	11.7053	Tumor
TCGA-55-7994-01	11.6198	Tumor
TCGA-05-4420-01	11.7027	Tumor
TCGA-50-6591-01	12.55	Tumor
TCGA-38-4630-01	12.5561	Tumor
TCGA-49-6743-01	11.6207	Tumor
TCGA-55-8206-01	11.4942	Tumor
TCGA-MP-A5C7-01	11.5735	Tumor
TCGA-49-AARE-01	11.327	Tumor
TCGA-75-6203-01	11.0095	Tumor
TCGA-86-7955-01	12.7827	Tumor
TCGA-49-6744-01	11.3277	Tumor
TCGA-95-A4VN-01	11.2414	Tumor
TCGA-55-7576-01	11.5661	Tumor
TCGA-53-7626-01	11.1657	Tumor
TCGA-97-7546-01	10.7932	Tumor
TCGA-44-7672-01	11.3544	Tumor
TCGA-62-A46O-01	10.8978	Tumor
TCGA-55-6984-01	11.3728	Tumor
TCGA-97-8174-01	11.0307	Tumor
TCGA-35-4123-01	12.015	Tumor
TCGA-93-A4JO-01	11.2016	Tumor
TCGA-97-7937-01	11.4739	Tumor
TCGA-50-6597-01	10.9054	Tumor
TCGA-99-8033-01	11.0417	Tumor
TCGA-55-7570-01	12.3225	Tumor
TCGA-38-4626-01	11.2062	Tumor
TCGA-69-7764-01	11.7246	Tumor
TCGA-05-5715-01	11.3244	Tumor
TCGA-50-6590-01	11.2297	Tumor
TCGA-86-7713-01	11.8002	Tumor
TCGA-S2-AA1A-01	10.8223	Tumor
TCGA-75-7027-01	11.3001	Tumor
TCGA-50-5049-01	11.9744	Tumor
TCGA-55-8505-01	11.0964	Tumor
TCGA-49-AAR0-01	12.2748	Tumor
TCGA-MP-A4T9-01	11.7087	Tumor
TCGA-95-7567-01	11.9691	Tumor
TCGA-05-4422-01	11.0403	Tumor
TCGA-86-8673-01	10.3392	Tumor
TCGA-55-6543-01	11.5272	Tumor
TCGA-NJ-A7XG-01	11.2542	Tumor
TCGA-86-8280-01	11.4624	Tumor
TCGA-99-8028-01	11.1587	Tumor
TCGA-55-7725-01	11.6769	Tumor
TCGA-64-5778-01	12.2427	Tumor
TCGA-86-8671-01	11.2807	Tumor
TCGA-05-4403-01	11.4012	Tumor
TCGA-69-7763-01	11.7049	Tumor
TCGA-49-4506-01	12.5967	Tumor
TCGA-97-A4M1-01	11.6293	Tumor
TCGA-86-8359-01	11.2216	Tumor
TCGA-05-4405-01	10.8438	Tumor
TCGA-62-A470-01	11.4982	Tumor
TCGA-49-4487-01	11.4181	Tumor
TCGA-44-6145-01	10.7176	Tumor
TCGA-91-8499-01	13.4722	Tumor
TCGA-95-8494-01	11.9425	Tumor
TCGA-64-1681-01	11.3139	Tumor
TCGA-55-A491-01	11.1545	Tumor
TCGA-75-6214-01	11.0595	Tumor
TCGA-86-6851-01	10.9533	Tumor
TCGA-80-5607-01	11.5457	Tumor
TCGA-91-6849-01	11.471	Tumor
TCGA-62-8402-01	11.8301	Tumor
TCGA-78-7156-01	11.8675	Tumor
TCGA-50-5941-01	11.4567	Tumor
TCGA-62-A46Y-01	11.6102	Tumor
TCGA-44-7660-01	12.0441	Tumor
TCGA-MP-A4TF-01	11.554	Tumor
TCGA-05-4402-01	11.8237	Tumor
TCGA-62-A471-01	11.5282	Tumor
TCGA-55-8513-01	10.7549	Tumor
TCGA-05-4397-01	11.9505	Tumor
TCGA-05-5429-01	12.151	Tumor
TCGA-78-7167-01	11.4828	Tumor
TCGA-50-8459-01	11.3467	Tumor
TCGA-93-8067-01	12.0503	Tumor
TCGA-44-6776-01	11.0781	Tumor
TCGA-75-7031-01	10.8351	Tumor
TCGA-44-7667-01	13.542	Tumor
TCGA-35-3615-01	12.9827	Tumor
TCGA-86-A4P8-01	10.833	Tumor
TCGA-44-2666-01	11.759	Tumor
TCGA-44-5643-01	11.4111	Tumor
TCGA-44-2661-01	11.9399	Tumor
TCGA-69-8255-01	12.2367	Tumor
TCGA-49-4514-01	11.1675	Tumor
TCGA-78-7154-01	11.591	Tumor
TCGA-55-8507-01	12.0141	Tumor
TCGA-95-A4VP-01	11.1883	Tumor
TCGA-50-6595-01	11.5506	Tumor
TCGA-78-7155-01	11.842	Tumor
TCGA-05-4382-01	11.1278	Tumor
TCGA-05-5428-01	12.2408	Tumor
TCGA-44-5644-01	10.3848	Tumor
TCGA-55-6978-01	11.3914	Tumor
TCGA-NJ-A55R-01	11.2313	Tumor
TCGA-91-6840-01	12.5441	Tumor
TCGA-55-8094-01	11.4214	Tumor
TCGA-44-7661-01	11.2381	Tumor
TCGA-NJ-A4YF-01	12.059	Tumor
TCGA-67-6217-01	10.7995	Tumor
TCGA-86-A4D0-01	12.6714	Tumor
TCGA-50-5939-01	11.3074	Tumor
TCGA-05-4410-01	11.0217	Tumor
TCGA-55-7816-01	11.3939	Tumor
TCGA-50-5051-01	11.8159	Tumor
TCGA-86-8279-01	11.7165	Tumor
TCGA-55-6970-01	12.146	Tumor
TCGA-49-4488-01	12.3437	Tumor
TCGA-97-7552-01	10.8638	Tumor
TCGA-95-7947-01	11.3511	Tumor
TCGA-05-4425-01	11.3106	Tumor
TCGA-78-7633-01	11.2867	Tumor
TCGA-64-1678-01	13.4956	Tumor
TCGA-80-5608-01	11.9179	Tumor
TCGA-64-5775-01	12.8352	Tumor
TCGA-55-8508-01	11.4971	Tumor
TCGA-44-2656-01	11.4727	Tumor
TCGA-55-7281-01	11.1567	Tumor
TCGA-J2-8194-01	11.661	Tumor
TCGA-78-7150-01	11.0579	Tumor
TCGA-44-A47G-01	11.098	Tumor
TCGA-99-8025-01	11.6913	Tumor
TCGA-50-6592-01	10.9747	Tumor
TCGA-05-4249-01	11.471	Tumor
TCGA-97-7553-01	11.2044	Tumor
TCGA-75-5125-01	10.9959	Tumor
TCGA-67-3772-01	11.5868	Tumor
TCGA-78-7147-01	11.638	Tumor
TCGA-38-4628-01	11.8551	Tumor
TCGA-99-8032-01	11.6967	Tumor
TCGA-78-8648-01	10.9938	Tumor
TCGA-62-A46S-01	11.0569	Tumor
TCGA-NJ-A55O-01	10.8582	Tumor
TCGA-44-6779-01	11.617	Tumor
TCGA-97-7938-01	10.7227	Tumor
TCGA-MP-A4SW-01	11.1947	Tumor
TCGA-49-AARN-01	11.7453	Tumor
TCGA-55-8097-01	11.3856	Tumor
TCGA-93-A4JQ-01	11.112	Tumor
TCGA-55-8299-01	11.2097	Tumor
TCGA-4B-A93V-01	13.6614	Tumor
TCGA-75-6207-01	11.7301	Tumor
TCGA-05-4417-01	11.5801	Tumor
TCGA-78-7143-01	11.1686	Tumor
TCGA-44-3396-01	11.4013	Tumor
TCGA-53-7624-01	10.5645	Tumor
TCGA-75-5147-01	12.8013	Tumor
TCGA-55-1596-01	12.2923	Tumor
TCGA-44-5645-01	10.9453	Tumor
TCGA-05-4244-01	11.1865	Tumor
TCGA-55-6971-01	11.5268	Tumor
TCGA-73-7498-01	11.3722	Tumor
TCGA-49-AARO-01	11.6561	Tumor
TCGA-05-4396-01	10.5308	Tumor
TCGA-69-8254-01	11.3426	Tumor
TCGA-J2-A4AG-01	10.7108	Tumor
TCGA-50-5066-02	11.876	Tumor
TCGA-78-7146-01	11.0545	Tumor
TCGA-73-4677-01	11.8133	Tumor
TCGA-97-7554-01	11.1083	Tumor
TCGA-L9-A443-01	10.9586	Tumor
TCGA-55-6987-01	11.6599	Tumor
TCGA-78-7220-01	11.561	Tumor
TCGA-64-1677-01	12.7069	Tumor
TCGA-73-4666-01	11.7086	Tumor
TCGA-49-4486-01	11.537	Tumor
TCGA-MN-A4N5-01	11.4773	Tumor
TCGA-78-7152-01	11.5494	Tumor
TCGA-83-5908-01	12.0861	Tumor
TCGA-50-6593-01	11.1191	Tumor
TCGA-MP-A4TC-01	10.7507	Tumor
TCGA-78-7542-01	11.2333	Tumor
TCGA-55-8615-01	11.0038	Tumor
TCGA-55-A493-01	10.8472	Tumor
TCGA-71-6725-01	11.9733	Tumor
TCGA-73-4668-01	10.9642	Tumor
TCGA-78-7158-01	12.1468	Tumor
TCGA-44-7659-01	11.585	Tumor
TCGA-05-5425-01	11.7531	Tumor
TCGA-64-1679-01	11.4962	Tumor
TCGA-55-8506-01	11.1787	Tumor
TCGA-78-7166-01	12.1091	Tumor
TCGA-91-8496-01	12.1218	Tumor
TCGA-55-7283-01	11.4356	Tumor
TCGA-55-A4DG-01	11.1767	Tumor
TCGA-44-8119-01	12.4121	Tumor
TCGA-71-8520-01	10.8209	Tumor
TCGA-44-A47B-01	11.5802	Tumor
TCGA-73-4670-01	12.5311	Tumor
TCGA-MP-A4T7-01	11.6871	Tumor
TCGA-55-8203-01	12.1134	Tumor
TCGA-64-5774-01	12.4502	Tumor
TCGA-50-5933-01	10.7896	Tumor
TCGA-50-5946-01	11.6796	Tumor
TCGA-50-8460-01	11.3194	Tumor
TCGA-05-4250-01	11.8825	Tumor
TCGA-L9-A50W-01	11.1493	Tumor
TCGA-44-7662-01	11.4066	Tumor
TCGA-97-A4M6-01	11.5047	Tumor
TCGA-44-7669-01	11.2184	Tumor
TCGA-78-8640-01	12.9602	Tumor
TCGA-50-5931-01	11.403	Tumor
TCGA-44-3918-01	12.0631	Tumor
TCGA-93-7347-01	11.2079	Tumor
TCGA-38-7271-01	11.4358	Tumor
TCGA-55-7724-01	11.1016	Tumor
TCGA-73-A9RS-01	12.1023	Tumor
TCGA-49-4494-01	11.9153	Tumor
TCGA-49-4512-01	11.5356	Tumor
TCGA-62-8395-01	10.6945	Tumor
TCGA-55-A57B-01	11.3994	Tumor
TCGA-97-A4M5-01	11.5559	Tumor
TCGA-67-3774-01	10.9022	Tumor
TCGA-J2-8192-01	11.3146	Tumor
TCGA-78-7535-01	11.0507	Tumor
TCGA-95-A4VK-01	11.8248	Tumor
TCGA-38-4629-01	12.2912	Tumor
TCGA-35-5375-01	13.5304	Tumor
TCGA-38-4625-01	12.2266	Tumor
TCGA-91-6836-01	11.7152	Tumor
TCGA-73-4675-01	10.9898	Tumor
TCGA-62-8394-01	11.6191	Tumor
TCGA-86-7711-01	10.4528	Tumor
TCGA-78-7160-01	11.4374	Tumor
TCGA-55-6982-01	11.3599	Tumor
TCGA-55-6712-01	11.0344	Tumor
TCGA-55-7995-01	10.9313	Tumor
TCGA-69-A59K-01	11.063	Tumor
TCGA-50-5936-01	11.6818	Tumor
TCGA-73-4676-01	11.5285	Tumor
TCGA-86-6562-01	11.5828	Tumor
TCGA-35-4122-01	11.9357	Tumor
TCGA-75-6205-01	11.3168	Tumor
TCGA-80-5611-01	12.5535	Tumor
TCGA-93-A4JP-01	11.3443	Tumor
TCGA-50-5935-01	11.1872	Tumor
TCGA-05-4389-01	11.9981	Tumor
TCGA-44-A479-01	11.1781	Tumor
TCGA-67-4679-01	11.576	Tumor
TCGA-44-8120-01	11.7247	Tumor
TCGA-55-8089-01	10.9782	Tumor
TCGA-67-3773-01	12.1867	Tumor
TCGA-MP-A4TA-01	11.4981	Tumor
TCGA-50-5072-01	11.8631	Tumor
TCGA-55-8091-01	11.6777	Tumor
TCGA-97-A4LX-01	11.3994	Tumor
TCGA-55-6968-01	11.4094	Tumor
TCGA-MP-A4TH-01	10.7533	Tumor
TCGA-NJ-A4YQ-01	11.5873	Tumor
TCGA-44-A4SU-01	12.0229	Tumor
TCGA-49-4490-01	11.8391	Tumor
TCGA-97-A4M3-01	11.6849	Tumor
TCGA-J2-A4AD-01	11.7886	Tumor
TCGA-55-7227-01	11.4766	Tumor
TCGA-49-4505-01	11.3872	Tumor
TCGA-78-7153-01	12.0519	Tumor
TCGA-50-5944-01	11.3481	Tumor
TCGA-97-8172-01	11.3124	Tumor
TCGA-97-8171-01	13.4524	Tumor
TCGA-69-7761-01	10.8566	Tumor
TCGA-49-AARR-01	10.5587	Tumor
TCGA-L4-A4E6-01	10.9654	Tumor
TCGA-55-A48Y-01	11.8544	Tumor
TCGA-93-7348-01	11.2574	Tumor
TCGA-91-6847-01	13.2179	Tumor
TCGA-55-6980-01	11.4093	Tumor
TCGA-86-7953-01	11.6412	Tumor
TCGA-86-7714-01	11.5132	Tumor
TCGA-86-8585-01	12.1924	Tumor
TCGA-55-8511-01	12.8762	Tumor
TCGA-55-8092-01	10.8718	Tumor
TCGA-62-A46U-01	11.1102	Tumor
TCGA-55-8208-01	11.2976	Tumor
TCGA-64-1676-01	12.2937	Tumor
TCGA-91-A4BD-01	11.4892	Tumor
TCGA-78-7145-01	11.5289	Tumor
TCGA-97-8179-01	12.065	Tumor
TCGA-44-2662-01	11.0975	Tumor
TCGA-86-8074-01	11.8405	Tumor
TCGA-78-7540-01	10.543	Tumor
TCGA-05-4426-01	11.8693	Tumor
TCGA-50-8457-01	12.1522	Tumor
TCGA-75-5122-01	11.5273	Tumor
TCGA-55-6975-01	11.8748	Tumor
TCGA-86-8073-01	11.4326	Tumor
TCGA-86-8076-01	11.7653	Tumor
TCGA-62-A46P-01	11.8006	Tumor
TCGA-J2-A4AE-01	10.9233	Tumor
TCGA-67-3770-01	11.936	Tumor
TCGA-55-A490-01	11.2708	Tumor
TCGA-44-4112-01	11.5929	Tumor
TCGA-49-6745-01	11.5814	Tumor
TCGA-93-A4JN-01	11.6288	Tumor
TCGA-86-8054-01	12.2031	Tumor
TCGA-55-A4DF-01	11.6552	Tumor
TCGA-75-5146-01	10.9376	Tumor
TCGA-05-4384-01	11.4519	Tumor
TCGA-55-8207-01	11.5216	Tumor
TCGA-69-7760-01	11.5578	Tumor
TCGA-49-4510-01	11.5622	Tumor
TCGA-64-5815-01	11.5903	Tumor
TCGA-55-8620-01	11.5324	Tumor
TCGA-73-4662-01	11.063	Tumor
TCGA-49-AAR4-01	11.4345	Tumor
TCGA-55-7910-01	11.6485	Tumor
TCGA-55-8621-01	11.2495	Tumor
TCGA-55-6981-01	11.5726	Tumor
TCGA-MP-A4TJ-01	11.2045	Tumor
TCGA-50-5942-01	11.5316	Tumor
TCGA-05-4434-01	11.7701	Tumor
TCGA-78-7148-01	11.7343	Tumor
TCGA-69-8453-01	11.4007	Tumor
TCGA-97-8176-01	11.3549	Tumor
TCGA-67-3771-01	11.4783	Tumor
TCGA-78-8655-01	11.4316	Tumor
TCGA-95-7948-01	11.2669	Tumor
TCGA-78-7161-01	12.1553	Tumor
TCGA-05-4427-01	11.4155	Tumor
TCGA-97-A4M2-01	11.2105	Tumor
TCGA-50-5068-01	11.9416	Tumor
TCGA-44-6148-01	10.8231	Tumor
TCGA-78-7536-01	12.5559	Tumor
TCGA-50-5044-01	11.698	Tumor
TCGA-55-A48X-01	10.8835	Tumor
TCGA-55-A494-01	10.768	Tumor
TCGA-91-A4BC-01	11.5844	Tumor
TCGA-55-6986-01	12.2167	Tumor
TCGA-44-2657-01	11.3208	Tumor
TCGA-49-6767-01	11.8868	Tumor
TCGA-67-6216-01	11.7853	Tumor
TCGA-50-5930-01	11.1946	Tumor
TCGA-97-8552-01	10.9457	Tumor
TCGA-86-8281-01	11.6218	Tumor
TCGA-95-8039-01	11.7719	Tumor
TCGA-55-8204-01	12.1523	Tumor
TCGA-64-5781-01	11.6469	Tumor
TCGA-NJ-A4YI-01	11.0548	Tumor
TCGA-L9-A444-01	11.4413	Tumor
TCGA-MP-A4SV-01	11.6341	Tumor
TCGA-55-8090-01	11.7403	Tumor
TCGA-95-7944-01	10.8651	Tumor
TCGA-NJ-A4YG-01	11.7391	Tumor
TCGA-91-6830-01	11.3139	Tumor
TCGA-75-7030-01	10.9415	Tumor
TCGA-55-8512-01	10.7615	Tumor
TCGA-44-6777-01	11.0098	Tumor
TCGA-55-6985-01	11.4092	Tumor
TCGA-MP-A4TE-01	12.2889	Tumor
TCGA-L4-A4E5-01	11.7773	Tumor
TCGA-55-6969-01	11.5948	Tumor
TCGA-55-7815-01	11.5618	Tumor
TCGA-05-4390-01	12.6111	Tumor
TCGA-78-7537-01	11.4133	Tumor
TCGA-55-7284-01	10.5811	Tumor
TCGA-55-8614-01	12.396	Tumor
TCGA-75-5126-01	11.5676	Tumor
TCGA-95-7043-01	11.795	Tumor
TCGA-L9-A8F4-01	11.6442	Tumor
TCGA-44-7670-01	11.2078	Tumor
TCGA-95-7039-01	11.3116	Tumor
TCGA-MP-A4TI-01	11.5635	Tumor
TCGA-44-2665-01	11.7161	Tumor
TCGA-05-4395-01	11.9979	Tumor
TCGA-O1-A52J-01	11.2369	Tumor
TCGA-55-5899-01	12.0886	Tumor
TCGA-55-7728-01	11.1637	Tumor
TCGA-99-7458-01	10.8491	Tumor
TCGA-97-A4M0-01	10.7679	Tumor
TCGA-91-6848-01	11.2619	Tumor
TCGA-50-5055-01	11.7841	Tumor
TCGA-44-7671-01	11.2134	Tumor
TCGA-05-5423-01	11.7579	Tumor
TCGA-55-8619-01	10.7288	Tumor
TCGA-64-1680-01	11.5476	Tumor
TCGA-49-AAR3-01	11.8616	Tumor
TCGA-55-8514-01	11.9164	Tumor
TCGA-91-8497-01	11.2362	Tumor
TCGA-49-AAR9-01	11.454	Tumor
TCGA-44-6774-01	10.9765	Tumor
TCGA-44-3919-01	11.3159	Tumor
TCGA-44-6147-01	11.7572	Tumor
TCGA-55-8301-01	11.796	Tumor
TCGA-95-7562-01	13.5714	Tumor
TCGA-55-6983-01	11.6643	Tumor
TCGA-53-7813-01	12.1186	Tumor
TCGA-MN-A4N1-01	11.2765	Tumor
TCGA-78-7159-01	12.3163	Tumor
TCGA-50-6673-01	11.0975	Tumor
TCGA-75-7025-01	11.2839	Tumor
TCGA-55-7726-01	11.2622	Tumor
TCGA-L9-A743-01	11.1044	Tumor
TCGA-86-8358-01	11.2628	Tumor
TCGA-55-6972-01	12.2299	Tumor
TCGA-55-7727-01	11.3479	Tumor
TCGA-91-6831-01	12.1425	Tumor
TCGA-MN-A4N4-01	11.5473	Tumor
TCGA-55-8302-01	11.8723	Tumor
TCGA-MP-A4TK-01	11.7638	Tumor
