# Supplementary material for: APEX1 regulates alternative splicing of key tumorigenesis genes in non-small-cell lung cancer
Source: BMC Med Genomics. 2022 Jul 2;15:147. doi: 10.1186/s12920-022-01290-0 (PMC9250739; doi:10.1186/s12920-022-01290-0)
Supplement: Supplementary file 3 — Additional file 3: Table S3. Mapping of clean reads on the reference genome. [file 12920_2022_1290_MOESM3_ESM.xlsx]

## Sheet: Sheet1
Sample	APEX1_1st	APEX1_2nd	APEX1_3rd	Ctrl_1st	Ctrl_2nd	Ctrl_3rd
Total reads	76194078	103059664	88289698	70666798	88374562	94960674
Total mapped	73134098	98814864	83209594	67971349	84650672	90193620
	0.9598	0.9588	0.9425	0.9619	0.9579	0.9498
Total Uniquely mapped	70737461	96308459	81384357	66243453	82465943	88035236
	0.9672	0.9746	0.9781	0.9746	0.9742	0.9761
Splice reads	35786174	48133715	40492306	34447052	41989755	44212861
	0.5059	0.4998	0.4975	0.52	0.5092	0.5022
